# Supplementary material for: Theoretical investigation on the reaction mechanism of UTP cyclohydrolase
Source: Royal Society of Chemistry journal article supplement (doi:10.1039/d2cp01740g), 2022-01-01
Supplement: d2cp01740g2.pdf [file d2cp01740g2.pdf]

## Electronic Supplementary Information

### Theoretical investigation on the reaction mechanism of UTP cyclohydrolase

Qingwen Ouyang,<sup>a</sup> Yunjie Pang,<sup>a</sup> Chang Yuan,<sup>a</sup> Hongwei Tan,<sup>\*a</sup> Xichen Li<sup>\*a</sup> and  
Guangju Chen<sup>a</sup>

<sup>a</sup>Key Laboratory of Theoretical and Computational Photochemistry, Ministry of  
Education, College of Chemistry, Beijing Normal University, Beijing 100875, China.

E-mail: [hongwei.tan@bnu.edu.cn](mailto:hongwei.tan@bnu.edu.cn)

#### Table of Contents

|                                                                                                                                                                                                                                                                                                                                                                                                                                                                                   |   |
|-----------------------------------------------------------------------------------------------------------------------------------------------------------------------------------------------------------------------------------------------------------------------------------------------------------------------------------------------------------------------------------------------------------------------------------------------------------------------------------|---|
| <b>1 Schemes</b> .....                                                                                                                                                                                                                                                                                                                                                                                                                                                            | 3 |
| <b>Scheme S1</b> A possible mechanism of UrcA-catalyzed hydrolysis of UTP proposed by Zhang et al. ....                                                                                                                                                                                                                                                                                                                                                                           | 3 |
| <b>Scheme S2</b> The calculated mechanism of UrcA-catalyzed first hydrolysis reaction of UTP. ....                                                                                                                                                                                                                                                                                                                                                                                | 3 |
| <b>Scheme S3</b> The calculated mechanism of UrcA-catalyzed second hydrolysis reaction of UTP. ....                                                                                                                                                                                                                                                                                                                                                                               | 3 |
| <b>2 Figures</b> .....                                                                                                                                                                                                                                                                                                                                                                                                                                                            | 4 |
| <b>Figure S1</b> The residues included in the cluster models for DFT mechanism investigation (sticks), and the surrounding residues within 5 Å of them (lines), as well as the protein environment (cartoon). ....                                                                                                                                                                                                                                                                | 4 |
| <b>Figure S2</b> The optimized cluster models for investigation of two hydrolysis reactions in UrcA (RE1 (left) and RE2 (right)). The fixed atoms are marked with asterisks. ....                                                                                                                                                                                                                                                                                                 | 4 |
| <b>Figure S3</b> Free energy profile of the C6-N1 bond cleavage step of UTP which is calculated for the model without assistance from the enzyme. Reaction coordinates and hydrogen bonds are represented by coral and black dashed lines. The relative energies are labeled in kcal/mol. ....                                                                                                                                                                                    | 5 |
| <b>Figure S4</b> Representative structures of the conformational transition of the intermediate along the 120 ps heating stage of wild-type UrcA in complex with the intermediate. The key residues in the active site are represented as sticks. Zinc, carbon, oxygen, sulfur, phosphorus and nitrogen atoms are colored in slate, cyan, red, straw, orange and blue, respectively. The hydrogen bonds are represented as yellow dashed lines. Bond lengths are given in Å. .... | 6 |
| <b>Figure S5</b> During MD simulation, (A) the cleaved uracil moiety of the intermediate (chain from N1 to C6) keeps swinging at the active site, taking snapshot overlays at 20ns, 40ns, 80ns and 100ns, (B) distance variations of the hydrogen bonds between the intermediate, Arg310 and Tyr307, (C) time dependences for C6-C5-C4-N3 dihedral angle of the intermediate, (D) time dependences for C5-C4-N3-C2 and C4-N3-C2-N1 dihedral angles of the intermediate. ....      | 7 |

|                                                                                                                                                                                                                                                                                                                                                                                                                                                                                                                                      |    |
|--------------------------------------------------------------------------------------------------------------------------------------------------------------------------------------------------------------------------------------------------------------------------------------------------------------------------------------------------------------------------------------------------------------------------------------------------------------------------------------------------------------------------------------|----|
| <b>Figure S6</b> Representative structures of the position shift of the intermediate in 120 ps heating process of the Y307F mutant in complex with the intermediate. The key residues in the active site are represented as sticks. Zinc, carbon, oxygen, sulfur, phosphorus and nitrogen atoms are colored in slate, green, red, straw, orange and blue, respectively. The salt bridges and hydrogen bonds are represented as yellow dashed lines. Bond lengths are given in Å. ....                                                | 8  |
| <b>Figure S7</b> The root mean square deviation (RMSD) values of intermediates during 100ns simulations of the intermediate complexed of wild type UrcA (black) and Y322F mutant (purple), respectively, including initial heating and equilibration processes. ....                                                                                                                                                                                                                                                                 | 8  |
| <b>Figure S8</b> The conformation of the Y322F mutant in complex with the intermediate after 100 ns simulation. The key residues in the active site are represented as sticks. Water molecules not shown for clarity. Zinc, oxygen, sulfur, phosphorus and nitrogen atoms are colored in slate, red, straw, orange and blue, respectively. The carbon atoms are shown in pink and yellow in Y322F mutant and intermediate, respectively. The hydrogen bonds is represented as yellow dashed lines. Bond lengths are given in Å. .... | 9  |
| <b>Figure S9</b> The cluster model structure for studying the second hydrolysis reaction, exemplified by the optimized structure of the initial reactant (RE2). The data presented in the table summarize the important bond lengths and atomic charges of RE2. The hydrogen bonds are represented by black dashed lines. ....                                                                                                                                                                                                       | 10 |
| <b>3 Tables</b> .....                                                                                                                                                                                                                                                                                                                                                                                                                                                                                                                | 11 |
| <b>Table S1</b> Residues within 5 Å of the corresponding residues in the cluster models. ....                                                                                                                                                                                                                                                                                                                                                                                                                                        | 11 |
| <b>Table S2</b> Mulliken charge population of important atoms of uracil at the stationary points of UrcA-catalyzed first hydrolysis pathway of UTP. ....                                                                                                                                                                                                                                                                                                                                                                             | 11 |
| <b>Table S3</b> Mulliken charge population of important atoms of uracil at the stationary points of UrcA-catalyzed second hydrolysis pathway of UTP. ....                                                                                                                                                                                                                                                                                                                                                                            | 12 |

# 1 Schemes

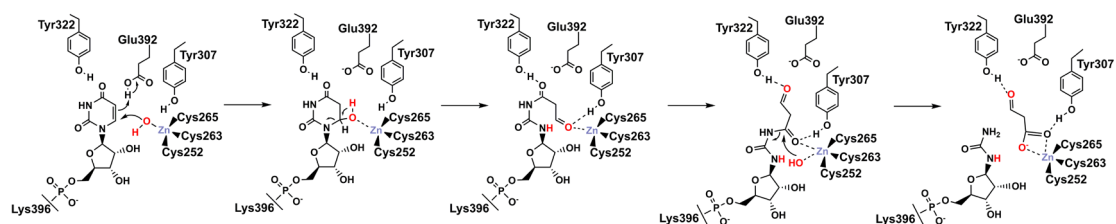

**Scheme S1** A possible mechanism of UrcA-catalyzed hydrolysis of UTP proposed by Zhang et al.

## First hydrolysis reaction

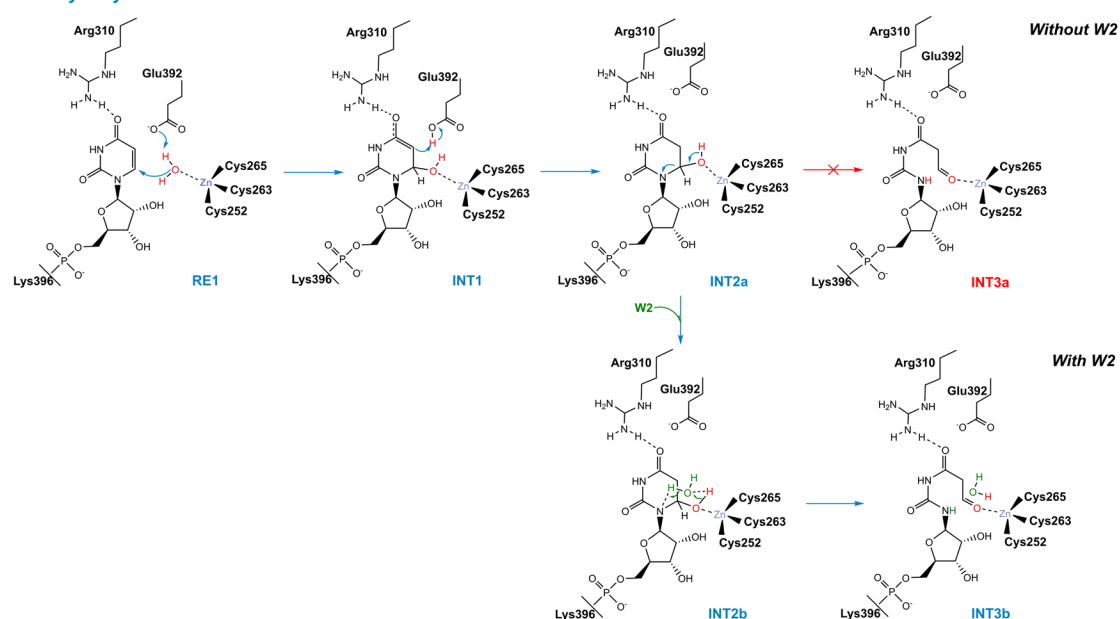

**Scheme S2** The calculated mechanism of UrcA-catalyzed first hydrolysis reaction of UTP.

## Second hydrolysis reaction

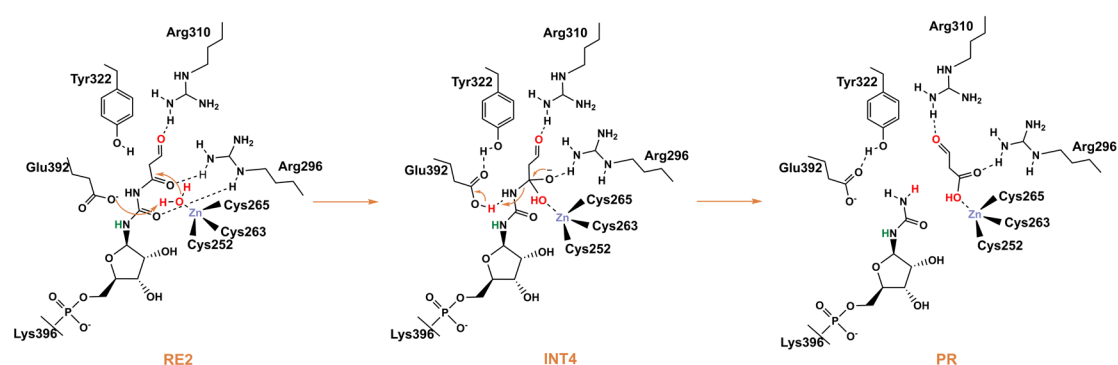

**Scheme S3** The calculated mechanism of UrcA-catalyzed second hydrolysis reaction of UTP.

## 2 Figures

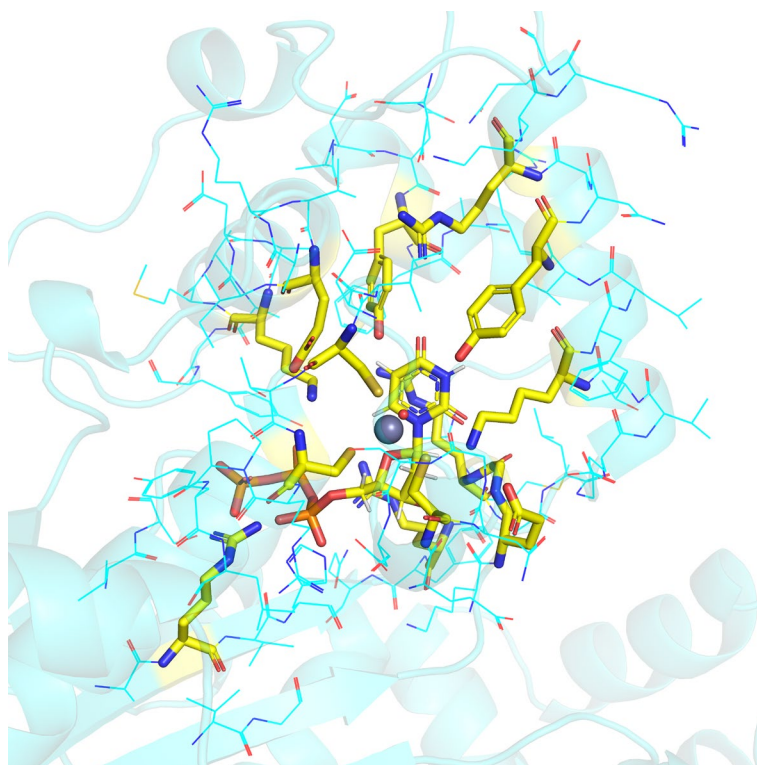

**Figure S1** The residues included in the cluster models for DFT mechanism investigation (sticks), and the surrounding residues within 5 Å of them (lines), as well as the protein environment (cartoon).

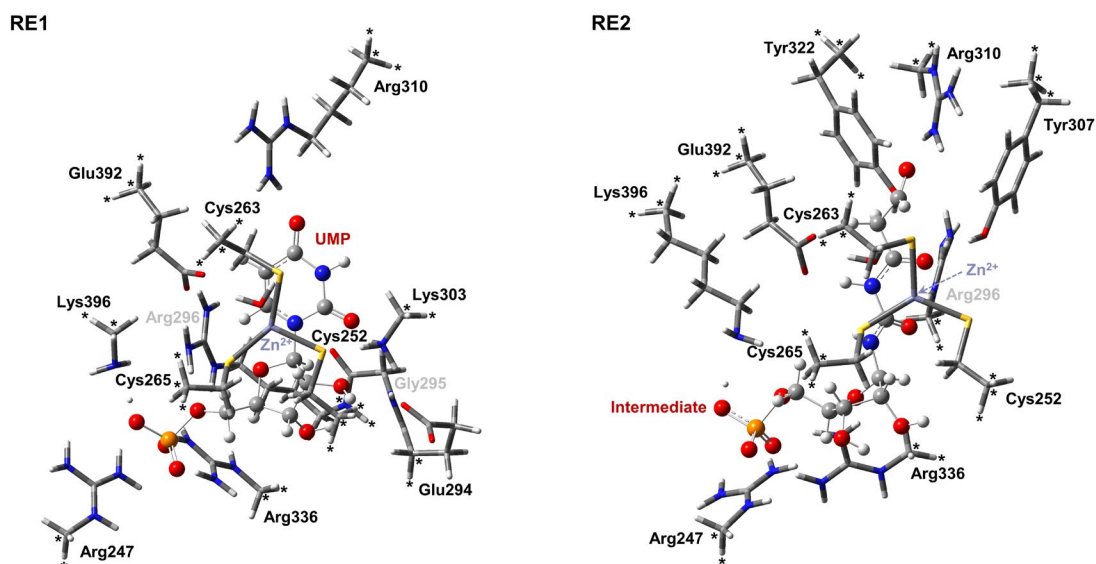

**Figure S2** The optimized cluster models for investigation of two hydrolysis reactions in Urca (RE1 (left) and RE2 (right)). The fixed atoms are marked with asterisks.

Figure S3 displays the intermediate INT2b<sup>2</sup> and TS3b<sup>2</sup> obtained from this small cluster model. Without the assistance from the protein environment, the corresponding free energy barrier of this step is as high as 36.8 kcal/mol, which clearly indicated that the enzyme plays critical role in catalyzing this reaction step. Compared to that in INT2b, in the optimized INT2b<sup>2</sup>, the conjugated bond of the uracil ring in the intermediate is stronger so that it presents a more planar conformation. Especially, C6-N1 bond is 1.51 Å in INT2b, which shortens to 1.47 Å in INT2b<sup>2</sup>. By comparing INT2b<sup>2</sup> with INT2b, it is believed that the hydrogen bond between Arg310 and C4=O carbonyl of uracil ring weakens the conjugation system of the uracil ring and activates the C6-N1 bond in this step. In addition, in INT2b<sup>2</sup>, the bridge water is no longer restrained by the hydrogen bond formed between it and Lys303, so that it does not point its O-H bond towards N1 but turns to form a hydrogen bond with the 2'-OH group on the glycosyl ring. Hence, to reach the transition state TS3b<sup>2</sup>, it costs extra energy to break down the hydrogen bond between the lytic water and 2'-OH group so that the bridge water is able to point its O-H bond towards N1 to deliver proton. It also infers that the residue Lys303 of the enzyme plays an indispensable role in the reaction.

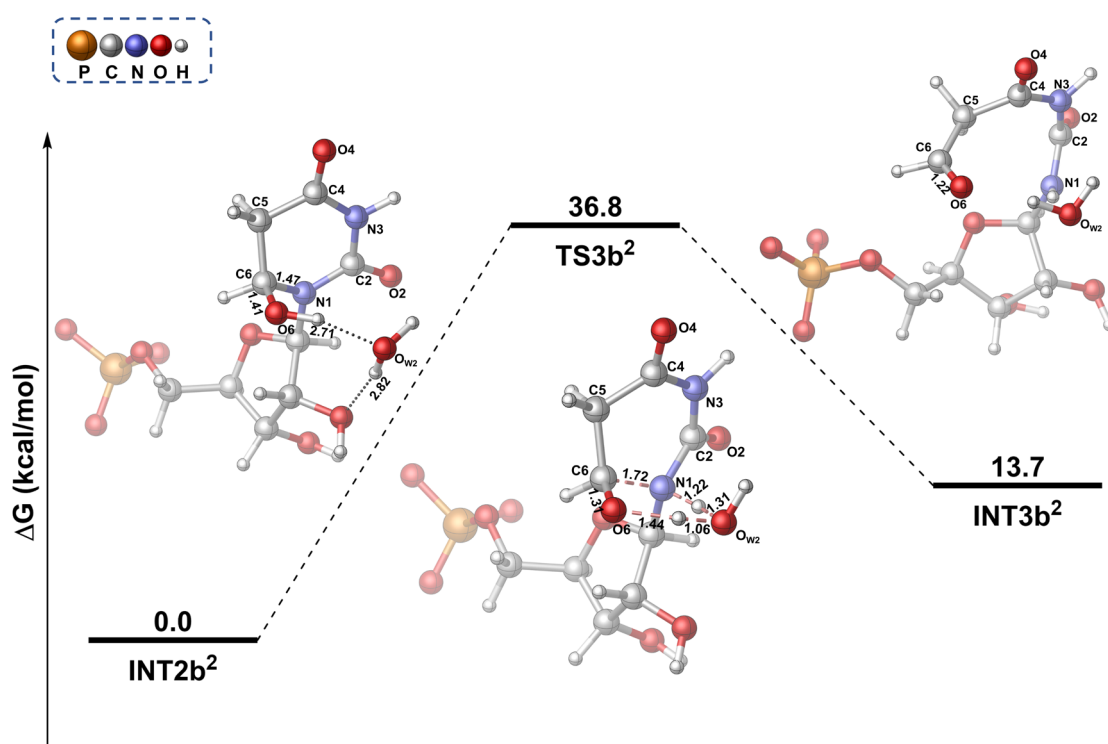

**Figure S3** Free energy profile of the C6-N1 bond cleavage step of UTP which is calculated for the model without assistance from the enzyme. Reaction coordinates and hydrogen bonds are represented by coral and black dashed lines. The relative energies are labeled in kcal/mol.

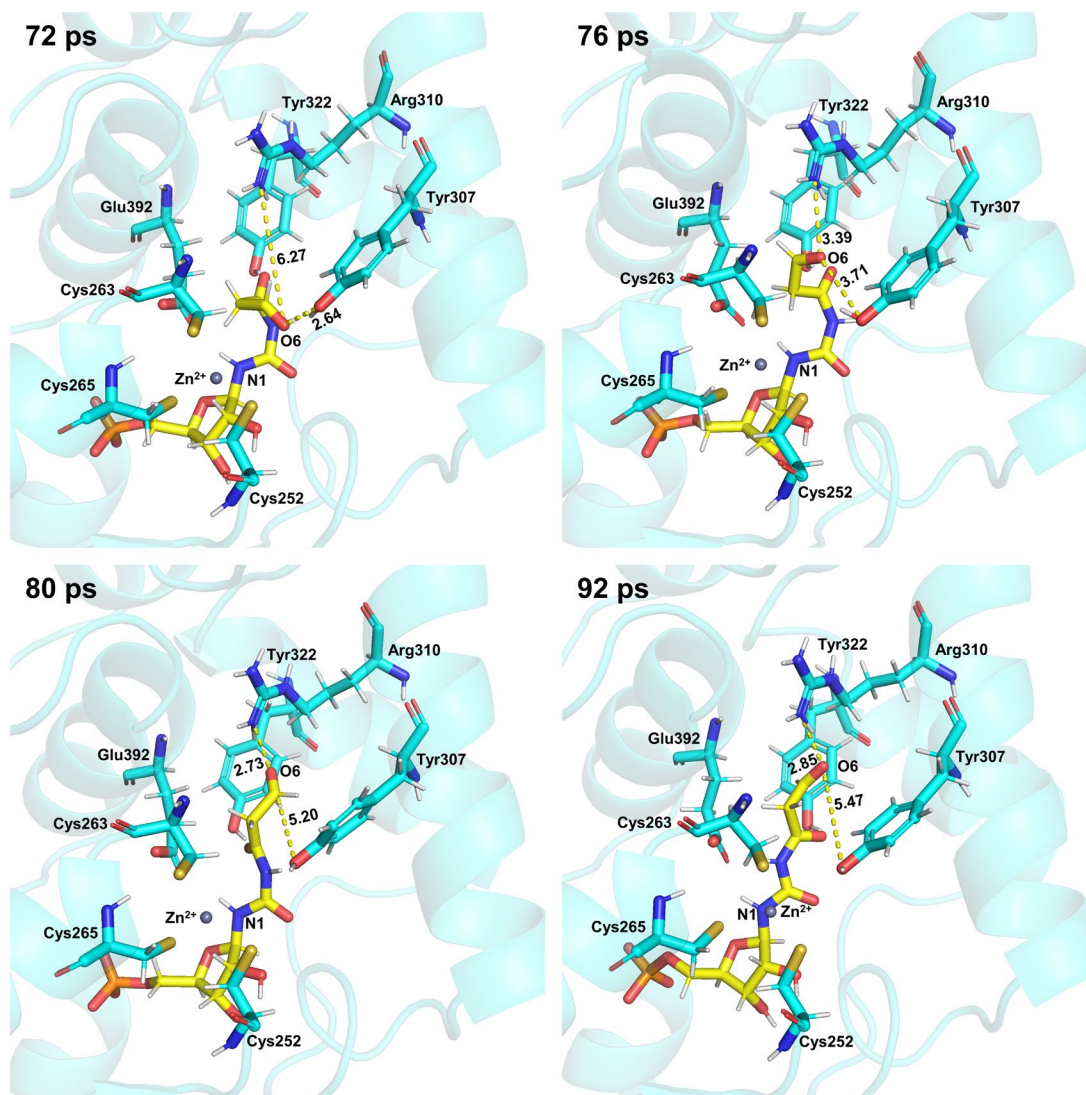

**Figure S4** Representative structures of the conformational transition of the intermediate along the 120 ps heating stage of wild-type UrcA in complex with the intermediate. The key residues in the active site are represented as sticks. Zinc, carbon, oxygen, sulfur, phosphorus and nitrogen atoms are colored in slate, cyan, red, straw, orange and blue, respectively. The hydrogen bonds are represented as yellow dashed lines. Bond lengths are given in Å.



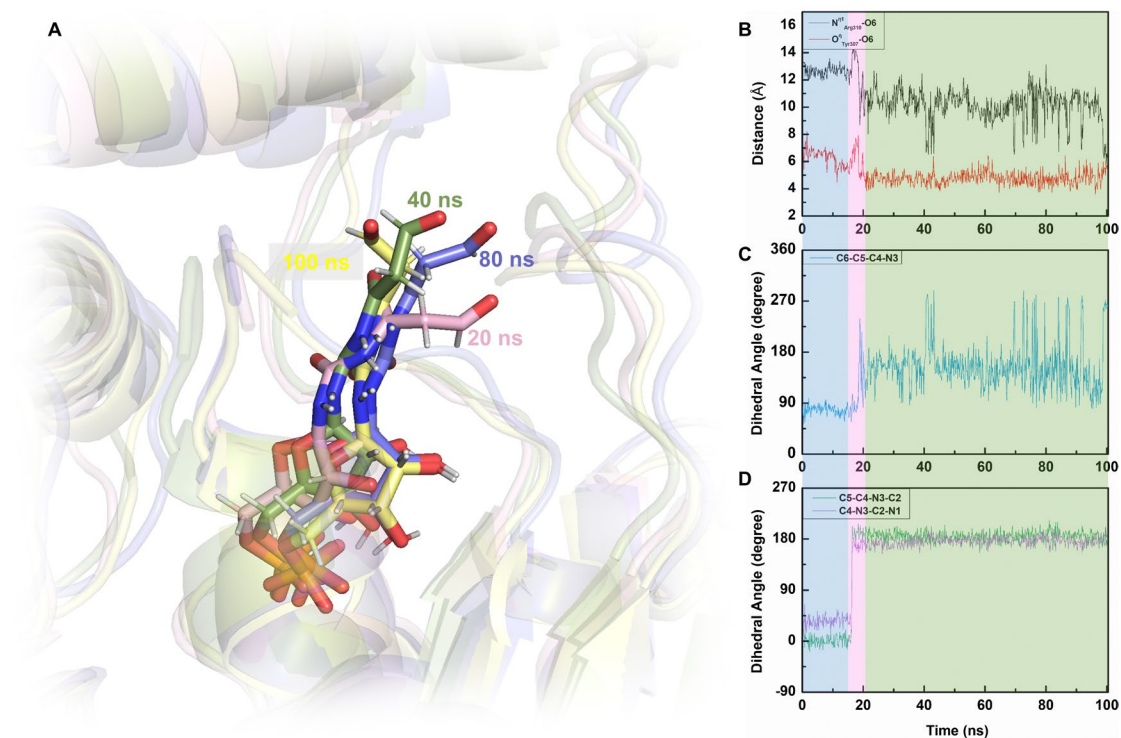

**Figure S5** During MD simulation, (A) the cleaved uracil moiety of the intermediate (chain from N1 to C6) keeps swinging at the active site, taking snapshot overlays at 20ns, 40ns, 80ns and 100ns, (B) distance variations of the hydrogen bonds between the intermediate, Arg310 and Tyr307, (C) time dependences for C6-C5-C4-N3 dihedral angle of the intermediate, (D) time dependences for C5-C4-N3-C2 and C4-N3-C2-N1 dihedral angles of the intermediate.

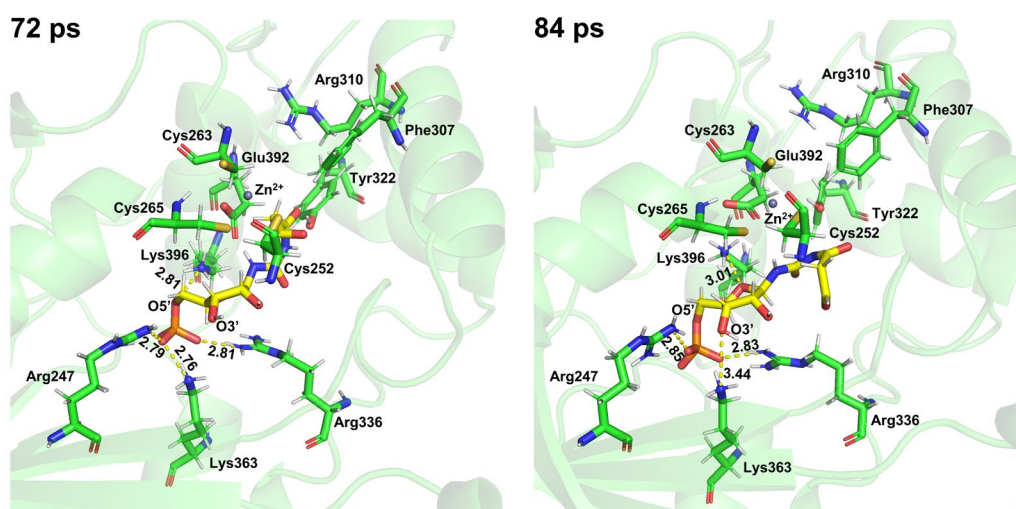

**Figure S6** Representative structures of the position shift of the intermediate in 120 ps heating process of the Y307F mutant in complex with the intermediate. The key residues in the active site are represented as sticks. Zinc, carbon, oxygen, sulfur, phosphorus and nitrogen atoms are colored in slate, green, red, straw, orange and blue, respectively. The salt bridges and hydrogen bonds are represented as yellow dashed lines. Bond lengths are given in Å.

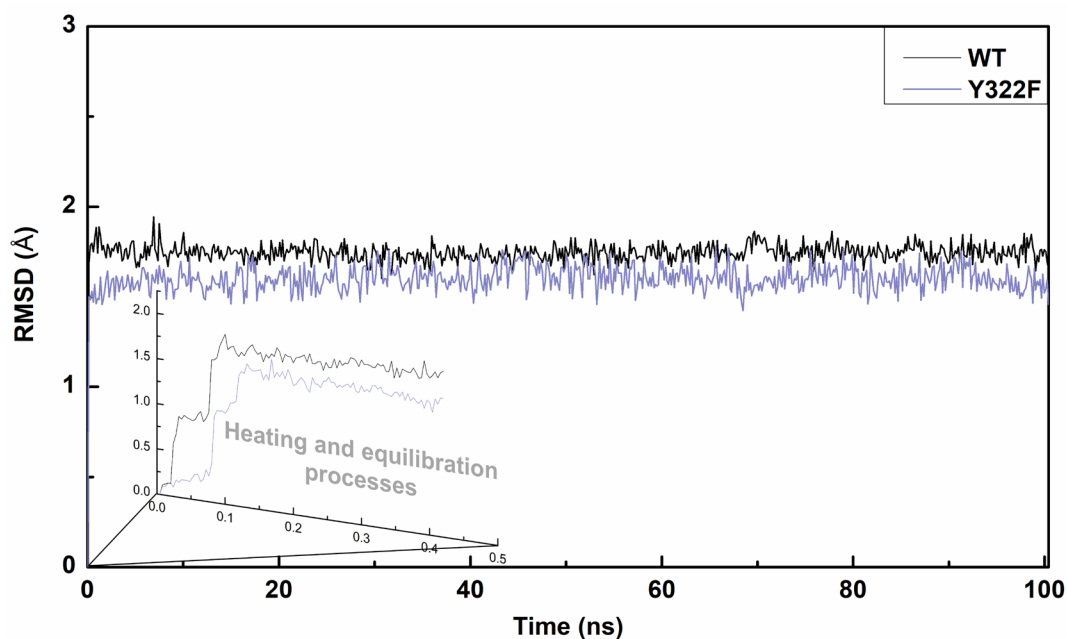

**Figure S7** The root mean square deviation (RMSD) values of intermediates during 100ns simulations of the intermediate complexed of wild type UrcaA (black) and Y322F mutant (purple), respectively, including initial heating and equilibration processes.



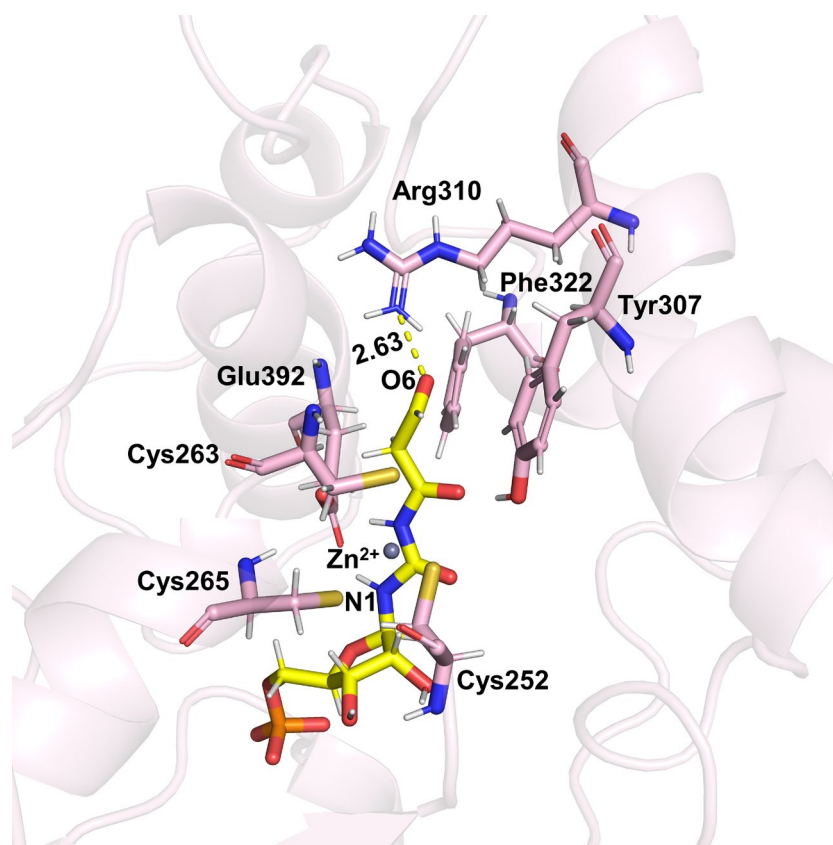

**Figure S8** The conformation of the Y322F mutant in complex with the intermediate after 100 ns simulation. The key residues in the active site are represented as sticks. Water molecules not shown for clarity. Zinc, oxygen, sulfur, phosphorus and nitrogen atoms are colored in slate, red, straw, orange and blue, respectively. The carbon atoms are shown in pink and yellow in Y322F mutant and intermediate, respectively. The hydrogen bonds is represented as yellow dashed lines. Bond lengths are given in Å.

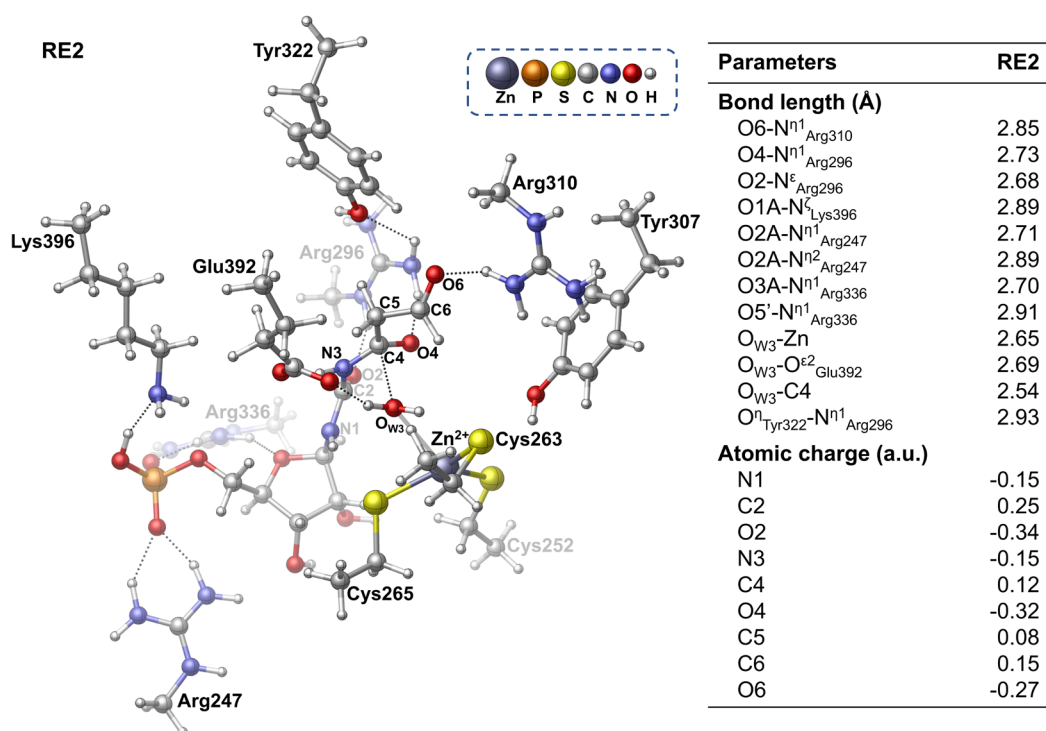

**Figure S9** The cluster model structure for studying the second hydrolysis reaction, exemplified by the optimized structure of the initial reactant (RE2). The data presented in the table summarize the important bond lengths and atomic charges of RE2. The hydrogen bonds are represented by black dashed lines.

### 3 Tables

**Table S1** Residues within 5 Å of the corresponding residues in the cluster models.

| Residues within 5 Å of the cluster models |        |        |        |        |        |        |        |        |        |        |
|-------------------------------------------|--------|--------|--------|--------|--------|--------|--------|--------|--------|--------|
| <b>Cys252</b>                             | Glu251 | Glu253 | Gly254 | Ser255 | Asp256 |        |        |        |        |        |
| <b>Cys263</b>                             | Ser255 | Asp261 | Ile262 | Thr264 | Cys265 | Ala389 |        |        |        |        |
| <b>Cys265</b>                             | Cys263 | Thr264 | Arg266 | Pro267 | Tyr268 | Leu269 |        |        |        |        |
| <b>Glu392</b>                             | Cys263 | Thr264 | Ala389 | Arg390 | Val391 | Ile393 | Asp394 | Ala395 | Lys396 |        |
| <b>Lys396</b>                             | Ile393 | Asp394 | Ala395 | Met397 | Ala398 | Ala399 | Gly400 | Tyr401 |        |        |
| <b>Arg336</b>                             | Arg296 | Ala297 | Asp334 | Met335 | Phe337 | Gln338 |        |        |        |        |
| <b>Arg247</b>                             | Ala246 | Val248 | His249 | Try268 | Leu269 | Val288 | Ala289 | Val357 | Ser358 |        |
| <b>Arg296</b>                             | Glu294 | Gly295 | Ala297 | Leu298 | Asp334 | Met335 | Arg336 |        |        |        |
| <b>Arg310</b>                             | Tyr307 | Asn308 | Ala309 | Lys311 | Arg312 | Gln313 | Asp317 | Val391 |        |        |
| <b>Lys303</b>                             | Cys252 | Gly295 | Glu300 | Val301 | Thr302 | Phe304 | Leu305 | Val306 | Tyr307 |        |
| <b>Glu294</b>                             | Glu251 | Cys252 | Asn253 | Lys293 | Gly295 | Arg296 | Ala297 | Leu298 | Gly299 | Glu300 |
| <b>Gly295</b>                             | Glu294 | Arg296 | Ala297 | Leu298 | Gly299 |        |        |        |        |        |
| <b>Tyr307</b>                             | Phe304 | Leu305 | Val306 | Asn308 | Ala309 | Arg310 | Lys311 |        |        |        |
| <b>Tyr322</b>                             | Ala319 | Asp320 | Gln321 | Phe323 | Ala324 | Arg325 | Glu392 |        |        |        |

**Table S2** Mulliken charge population of important atoms of uracil at the stationary points of UrcA-catalyzed first hydrolysis pathway of UTP.

|              | <b>N1</b> | <b>C2</b> | <b>O2</b> | <b>N3</b> | <b>C4</b> | <b>O4</b> | <b>C5</b> | <b>C6</b> |
|--------------|-----------|-----------|-----------|-----------|-----------|-----------|-----------|-----------|
| <b>RE1</b>   | -0.25     | 0.26      | -0.27     | -0.12     | 0.21      | -0.31     | -0.14     | 0.18      |
| <b>TS1</b>   | -0.29     | 0.26      | -0.31     | -0.12     | 0.22      | -0.38     | -0.25     | 0.30      |
| <b>INT1</b>  | -0.34     | 0.24      | -0.35     | -0.11     | 0.24      | -0.43     | -0.30     | 0.38      |
| <b>TS2</b>   | -0.30     | 0.24      | -0.33     | -0.13     | 0.22      | -0.40     | -0.34     | 0.30      |
| <b>INT2a</b> | -0.32     | 0.25      | -0.28     | -0.10     | 0.08      | -0.27     | 0.05      | 0.24      |
| <b>INT2b</b> | -0.43     | 0.22      | -0.22     | -0.13     | 0.13      | -0.22     | 0.05      | 0.24      |
| <b>TS3a</b>  | -0.35     | 0.23      | -0.20     | -0.08     | 0.12      | -0.24     | 0.11      | 0.21      |
| <b>TS3b</b>  | -0.33     | 0.21      | -0.18     | -0.12     | 0.12      | -0.21     | 0.08      | 0.23      |
| <b>INT3b</b> | -0.19     | 0.18      | -0.23     | -0.11     | 0.10      | -0.28     | 0.02      | 0.17      |

**Table S3** Mulliken charge population of important atoms of uracil at the stationary points of UrcA-catalyzed second hydrolysis pathway of UTP.

|             | <b>N1</b> | <b>C2</b> | <b>O2</b> | <b>N3</b> | <b>C4</b> | <b>O4</b> | <b>C5</b> | <b>C6</b> |
|-------------|-----------|-----------|-----------|-----------|-----------|-----------|-----------|-----------|
| <b>RE2</b>  | -0.15     | 0.25      | -0.34     | -0.15     | 0.12      | -0.32     | 0.08      | 0.15      |
| <b>TS4</b>  | -0.15     | 0.23      | -0.34     | -0.18     | 0.16      | -0.39     | 0.11      | 0.16      |
| <b>INT4</b> | -0.16     | 0.17      | -0.28     | -0.27     | 0.22      | -0.28     | -0.01     | 0.15      |
| <b>TS5</b>  | -0.15     | 0.21      | -0.36     | -0.33     | 0.22      | -0.36     | 0.02      | 0.15      |
| <b>PR</b>   | -0.20     | 0.17      | -0.36     | -0.11     | 0.22      | -0.27     | -0.03     | 0.13      |
